# Supplementary material
Source: PubMed Central journal article supplement (PMC5165664)
Supplement: Supp_Table1.pdf [file Supp_Table1.pdf]

## Supplementary Data

SUPPLEMENTARY TABLE S1. PRIMERS AND THEIR SEQUENCES USED

| <i>Target gene</i> | <i>Primer sequences (5' to 3')</i>                   | <i>Annealing temperature (°C)</i> | <i>Accession no.</i> | <i>Amplicon size (bp)</i> |
|--------------------|------------------------------------------------------|-----------------------------------|----------------------|---------------------------|
| <i>LPL</i>         | F:TCAACTGGATGGAGGAGGAG<br>R:GGGGCTTCTGCATACTCAAA     | 59                                | NM_000237.2          | 169                       |
| <i>PPAR-G</i>      | F:TCTCCAGCATTCTACTCCACA<br>R:GATGCAGGCTCCACTTTGAT    | 59                                | NM_138711.3          | 127                       |
| <i>RUNX</i>        | F: ATGACACTGCCACCTCTGA<br>R:ATGAAATGCTTGGGAACTGC     | 60                                | NM_001024630.3       | 117                       |
| <i>COL1</i>        | F:ATGCCTGGTGAACGTGGT<br>R:AGGAGAGCCATCAGCACCT        | 60                                | NM_000088.3          | 87                        |
| <i>GAPDH</i>       | F:GTTCTTCATTCACTAAGGAAGG<br>R:CAAGAGCATCATTGAACTTCAC | 60                                | NM_002046.5          | 122                       |
